# Supplementary material for: cdc-25.4, aCaenorhabditis elegansOrtholog ofcdc25, Is Required for Male Mating Behavior
Source: Oxford University Press journal article supplement (doi:10.1534/g3.116.036129), 2016-10-25
Supplement: 036129_figures1.pdf [file 036129_figures1.pdf]

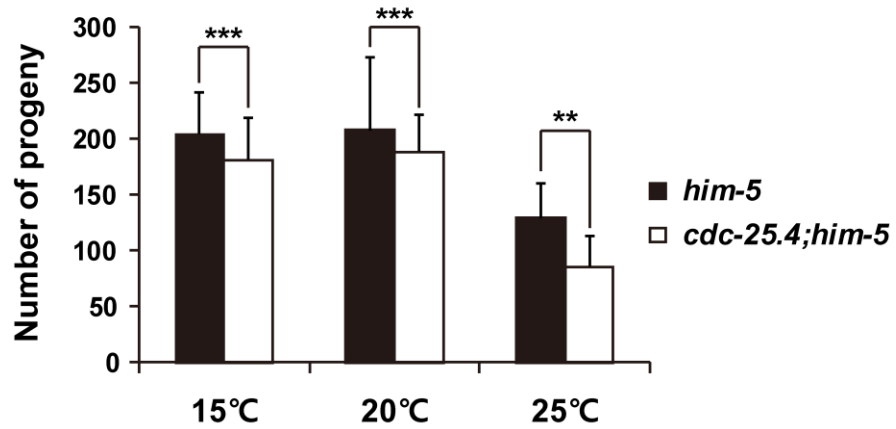

**Figure S1** *cdc-25.4(tm4088)* mutant hermaphrodites are fertile. Brood size was examined in *him-5(e1467)* (n=10) and *cdc-25.4(tm4088); him-5(e1467)* (n=10) adult hermaphrodites at three different temperatures (15°C, 20°C, and 25°C). Error bars indicate standard deviation. *P* values were calculated by Student's *t*-test. \*\**p* < 0.05, \*\*\**p* > 0.05.
