# Supplementary material for: cdc-25.4, aCaenorhabditis elegansOrtholog ofcdc25, Is Required for Male Mating Behavior
Source: Oxford University Press journal article supplement (doi:10.1534/g3.116.036129), 2016-10-25
Supplement: 036129_figures2.pdf [file 036129_figures2.pdf]

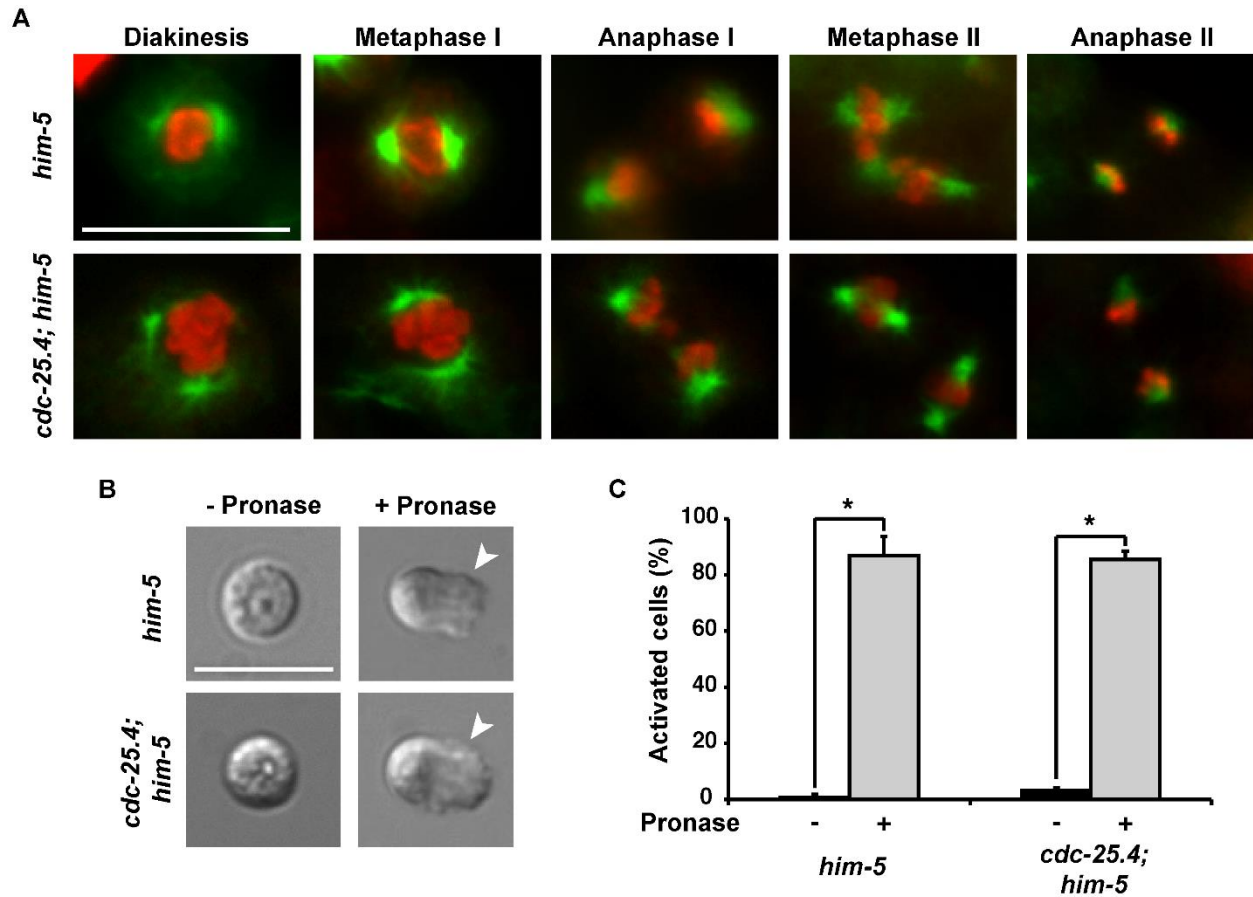

**Figure S2** Spermatogenesis and *in vitro* sperm activation occurred normally in *cdc-25.4(tm4088)* males. (A) Meiosis I and II were observed in dissected *him-5(e1467)* (n=31) and *cdc-25.4(tm4088); him-5(e1467)* (n=64) male gonads after co-immunostaining with anti-pH3 (red) and anti- $\alpha$ -tubulin (green). Diakinesis is the final stage of prophase in meiosis I. (B) Sperm were successfully activated *in vitro* after pronase treatment in *cdc-25.4(tm4088); him-5(e1467)* males, as in *him-5(e1467)* control males. Scale bars, 10  $\mu$ m. (C) Percent activated spermatids in *him-5(e1467)* and *cdc-25.4(tm4088); him-5(e1467)* males (n > 1300). Error bars indicate standard deviation. *P* values were calculated by Student's *t*-test. \**p* < 0.001.
