# Supplementary material for: cdc-25.4, aCaenorhabditis elegansOrtholog ofcdc25, Is Required for Male Mating Behavior
Source: Oxford University Press journal article supplement (doi:10.1534/g3.116.036129), 2016-10-25
Supplement: 036129_figures3.pdf [file 036129_figures3.pdf]

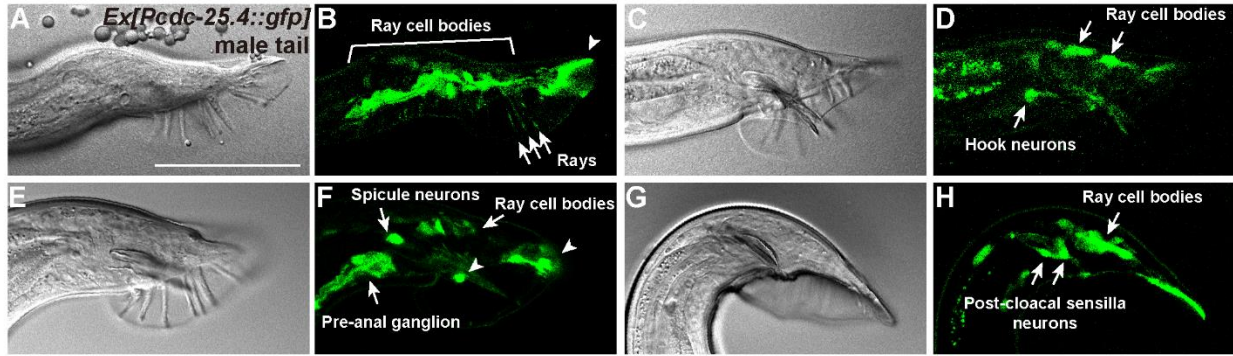

**Figure S3** Expression pattern of *Pcdc-25.4::gfp* in male tails. Nomarski DIC (A, C, E, G) and fluorescence (B, D, F, H) images of *Ex[Pcdc-25.4::gfp]* male tails are shown. The *Pcdc-25.4::gfp* transgene was expressed in the ray cell bodies (B, D, F, H), rays (B), hook neurons (HOA or HOB) (D), spicule neurons (SPC, SPD, or SPV) (F), pre-anal ganglion (F) and post-cloacal sensilla neurons (PCA, PCB, or PCC) (H) of male tails. Arrows indicate the loci where *Pcdc-25.4::gfp* was detected. Arrowheads indicate autofluorescence in fan and hook structure. Scale bars, 50  $\mu\text{m}$ .
