# Supplementary material for: cdc-25.4, aCaenorhabditis elegansOrtholog ofcdc25, Is Required for Male Mating Behavior
Source: Oxford University Press journal article supplement (doi:10.1534/g3.116.036129), 2016-10-25
Supplement: 036129_figures4.pdf [file 036129_figures4.pdf]

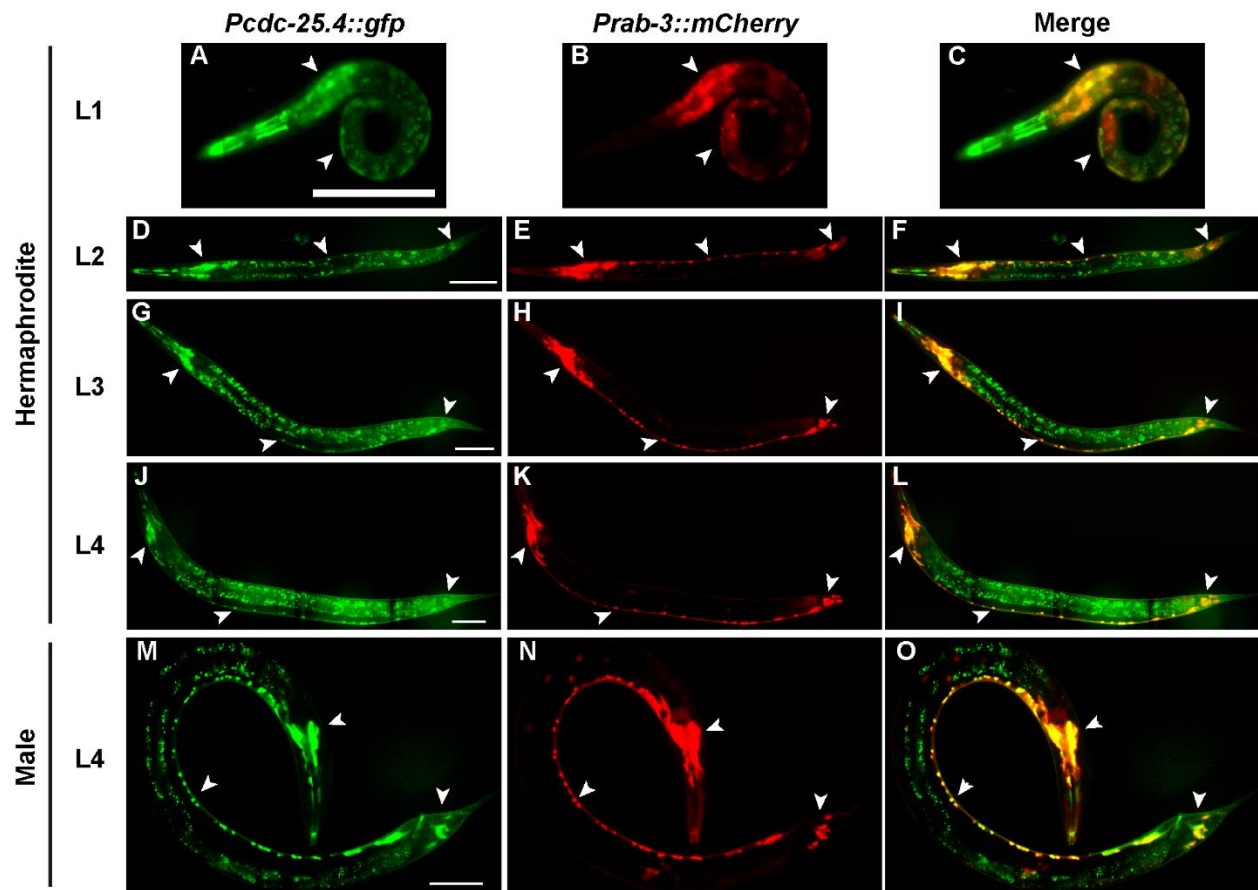

**Figure S4** Expression pattern of *Pcdc-25.4::gfp* during larval developmental stages. *Pcdc-25.4::gfp* was expressed in most neurons during larval development in both hermaphrodites and males (A, D, G, J, M). A pan-neuronal marker, *Prab-3::mCherry*, was co-expressed with *Pcdc-25.4::gfp*, and is shown as separate images (B, E, H, K, N) and as merged images (C, F, I, L, O) to illustrate partial overlap between *Pcdc-25.4::gfp* and *Prab-3::mCherry*. Arrowheads indicate the loci where two transgenes were co-expressed. Scale bars, 50  $\mu\text{m}$ .
