# Supplementary material for: cdc-25.4, aCaenorhabditis elegansOrtholog ofcdc25, Is Required for Male Mating Behavior
Source: Oxford University Press journal article supplement (doi:10.1534/g3.116.036129), 2016-10-25
Supplement: 036129_figures6.pdf [file 036129_figures6.pdf]

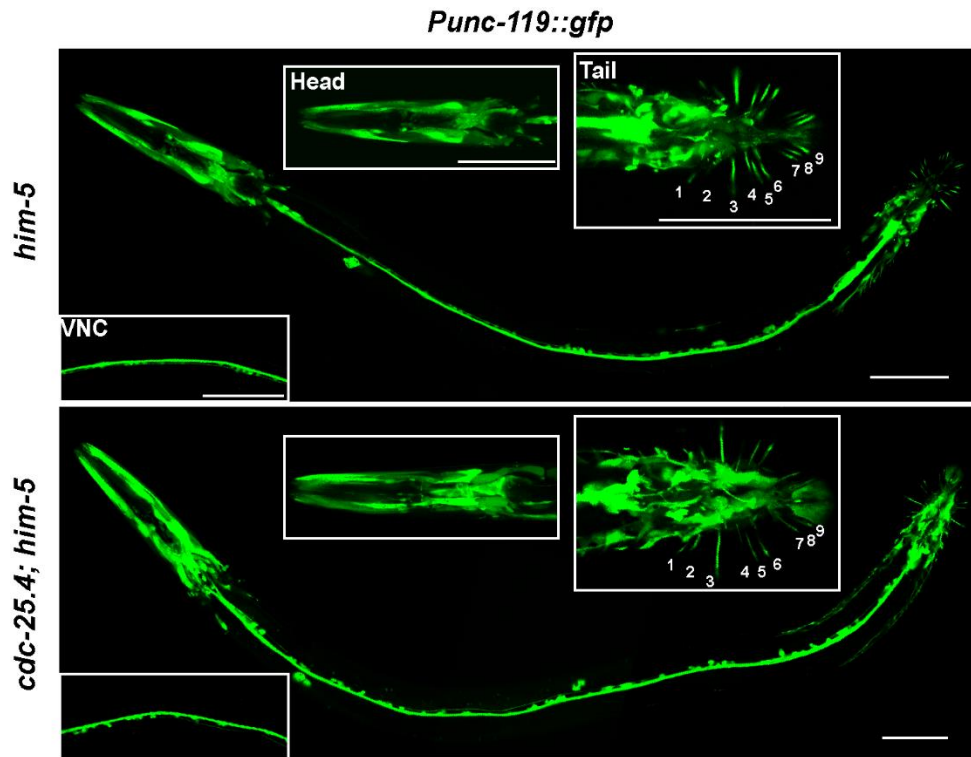

**Figure S6** Expression pattern of a pan-neuronal marker, *Punc-119::gfp*, was indistinguishable between *him-5(e1467)* and *cdc-25.4(tm4088); him-5(e1467)* adult males. Insets show *Punc-119::gfp* expression in the head, ventral nerve cord (VNC), and tail. Numbers in the tail images indicate that 9 rays were observed normally in males of both genotypes. Scale bars, 50  $\mu$ m.
