# Supplementary material for: cdc-25.4, aCaenorhabditis elegansOrtholog ofcdc25, Is Required for Male Mating Behavior
Source: Oxford University Press journal article supplement (doi:10.1534/g3.116.036129), 2016-10-25
Supplement: 036129_figures7.pdf [file 036129_figures7.pdf]

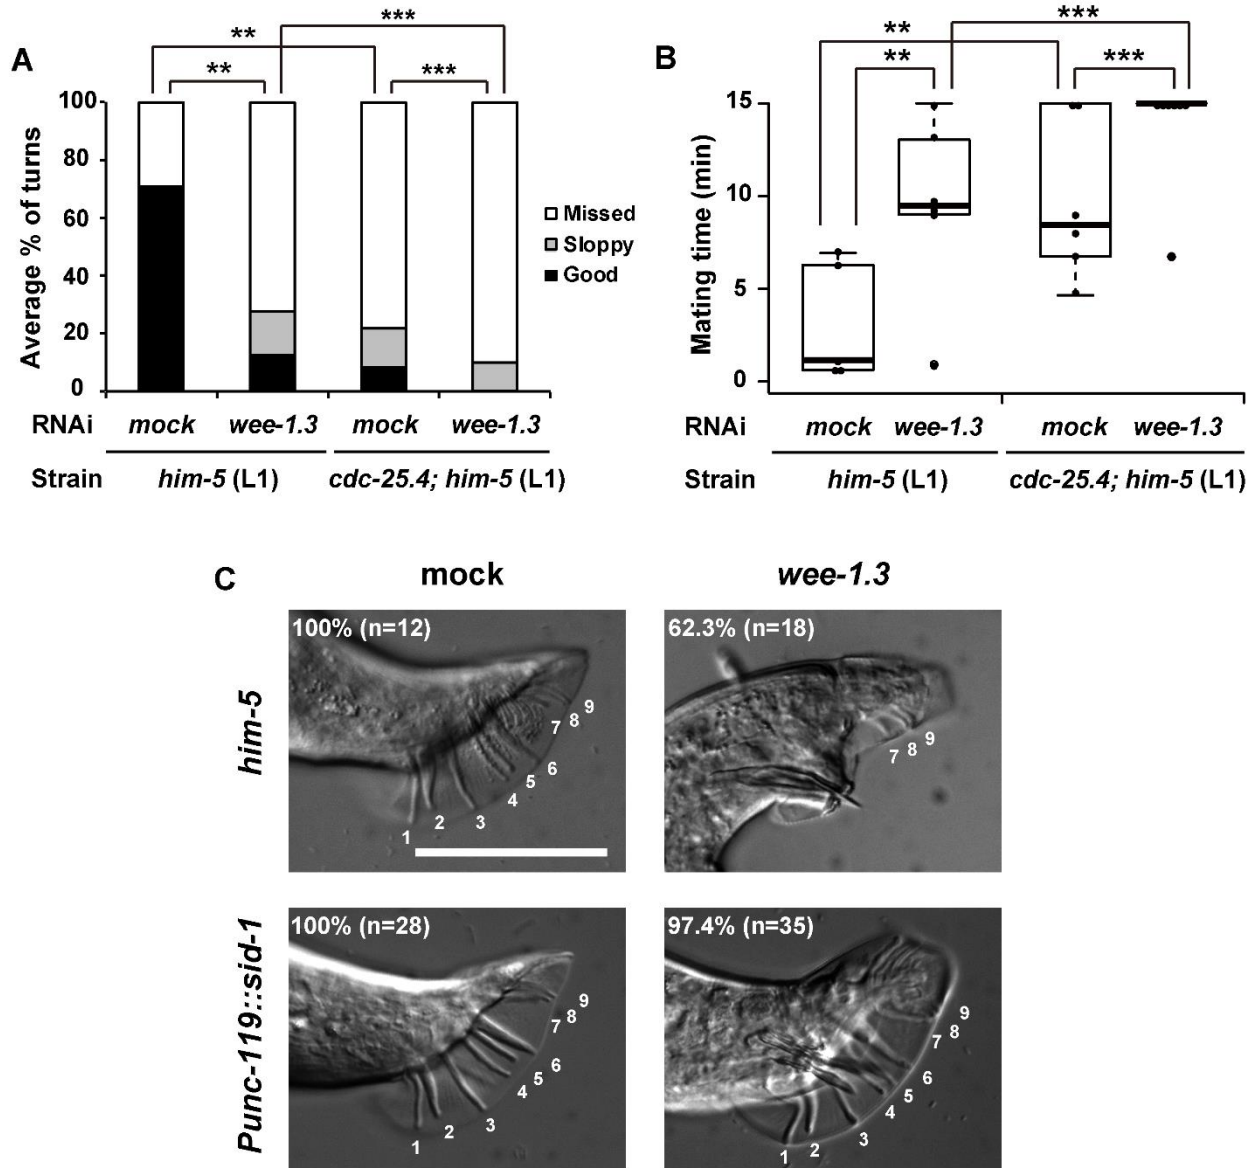

**Figure S7** RNAi depletion of *wee-1.3* did not suppress defective turning behavior of *cdc-25.4(tm4088)* males. (A) Levels of turning behavior in *him-5(e1467)* and *cdc-25.4(tm4088); him-5(e1467)* males, which were classified into good, sloppy, and missed, were measured after *wee-1.3* RNAi depletion at the L1 larval stage. (B) The time period (min) required for mating by *him-5(e1467)* and *cdc-25.4(tm4088); him-5(e1467)* males after *wee-1.3* RNAi depletion at the L1 larval stage. The result is displayed as a box plot. *P* values were calculated by Student's *t*-test. \*\* $p < 0.05$ , \*\*\* $p > 0.05$ . (C) Male tail phenotypes after depletion of *wee-1.3* are shown. 62.3% of *wee-1.3* depleted worms had severe defects in male tail development. Neuron-specific RNAi of *wee-1.3* did not cause abnormality in male tails. Scale bar, 50  $\mu$ m.
